# Supplementary material for: The coronary CT angiography vision protocol: a prospective observational imaging cohort study in patients undergoing non-cardiac surgery
Source: PubMed Central journal article supplement — BMJ Open. 2012 Jul 27;2(4):e001474. doi: 10.1136/bmjopen-2012-001474 (PMC3449273; doi:10.1136/bmjopen-2012-001474), 2012-07-27
Supplement: bmjopen-2012-001474.draft_revisions.pdf [file bmjopen-2012-001474.draft_revisions.pdf]

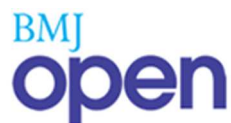

**THE CORONARY COMPUTED TOMOGRAPHIC ANGIOGRAPHY  
VISION PROTOCOL: A PROSPECTIVE OBSERVATIONAL  
IMAGING COHORT STUDY IN PATIENTS UNDERGOING  
NONCARDIAC SURGERY**

|                                 |                                                                                                                                                                                                                                                                                                                                                                                                                                                                                                                                                                                                                                                                                                                                                                                                                                                                                                                                                                                                                                                                                                                                                                                                                                                                                                                            |
|---------------------------------|----------------------------------------------------------------------------------------------------------------------------------------------------------------------------------------------------------------------------------------------------------------------------------------------------------------------------------------------------------------------------------------------------------------------------------------------------------------------------------------------------------------------------------------------------------------------------------------------------------------------------------------------------------------------------------------------------------------------------------------------------------------------------------------------------------------------------------------------------------------------------------------------------------------------------------------------------------------------------------------------------------------------------------------------------------------------------------------------------------------------------------------------------------------------------------------------------------------------------------------------------------------------------------------------------------------------------|
| Journal:                        | <i>BMJ Open</i>                                                                                                                                                                                                                                                                                                                                                                                                                                                                                                                                                                                                                                                                                                                                                                                                                                                                                                                                                                                                                                                                                                                                                                                                                                                                                                            |
| Manuscript ID:                  | bmjopen-2012-001474.R1                                                                                                                                                                                                                                                                                                                                                                                                                                                                                                                                                                                                                                                                                                                                                                                                                                                                                                                                                                                                                                                                                                                                                                                                                                                                                                     |
| Article Type:                   | Protocol                                                                                                                                                                                                                                                                                                                                                                                                                                                                                                                                                                                                                                                                                                                                                                                                                                                                                                                                                                                                                                                                                                                                                                                                                                                                                                                   |
| Date Submitted by the Author:   | 21-Jun-2012                                                                                                                                                                                                                                                                                                                                                                                                                                                                                                                                                                                                                                                                                                                                                                                                                                                                                                                                                                                                                                                                                                                                                                                                                                                                                                                |
| Complete List of Authors:       | Sheth, Tej; McMaster University, Cardiology<br>Butler, Craig; University of Alberta, Cardiology<br>Chow, Benjamin; University of Ottawa Heart Institute, Cardiology<br>Chan, MTV; The Chinese University of Hong Kong, Anesthesia and Intensive Care<br>Mitha, Aeysha; Inokusi Hospital, Radiology<br>Nagele, Peter; Washington University, Anesthesiology<br>Tandon, Vikas; McMaster University, Cardiology<br>Stewart, Lori; McMaster University, Radiology<br>Graham, Michelle; University of Alberta, Cardiology<br>Choi, GYS; The Chinese University of Hong Kong, Anesthesia and Intensive Care<br>Kisten, T; Inokusi Hospital, Anesthesia<br>Woodard, PK; Washington University, Radiology<br>Crean, Andrew; University Health Network, Cardiology<br>Abdul Aziz, YF; University of Malaya Research Imaging Centre, Biomedical Imaging<br>Karthikeyan, G; All India Institute of Medical Sciences, Cardiology<br>Chow, CK; Westmead Hospital & The George Institute for Global Health, The University of Sydney, Cardiology<br>Szczeklik, W; Jagiellonian University Medical College, Internal Medicine<br>Mrkobrada, M; University of Western Ontario, General Internal Medicine<br>Mastracci, T; Cleveland Clinic Foundation, Endovascular and Vascular Surgery<br>Devereaux, P.J.; McMaster University, Medicine |
| <b>Primary Subject Heading</b>: | Cardiovascular medicine                                                                                                                                                                                                                                                                                                                                                                                                                                                                                                                                                                                                                                                                                                                                                                                                                                                                                                                                                                                                                                                                                                                                                                                                                                                                                                    |
| Secondary Subject Heading:      | Diagnostics                                                                                                                                                                                                                                                                                                                                                                                                                                                                                                                                                                                                                                                                                                                                                                                                                                                                                                                                                                                                                                                                                                                                                                                                                                                                                                                |
| Keywords:                       | Coronary heart disease < RADIOLOGY, Computed tomography < RADIOLOGY & IMAGING, Cardiovascular imaging < RADIOLOGY & IMAGING                                                                                                                                                                                                                                                                                                                                                                                                                                                                                                                                                                                                                                                                                                                                                                                                                                                                                                                                                                                                                                                                                                                                                                                                |
|                                 |                                                                                                                                                                                                                                                                                                                                                                                                                                                                                                                                                                                                                                                                                                                                                                                                                                                                                                                                                                                                                                                                                                                                                                                                                                                                                                                            |

1  
2  
3  
4  
5  
6  
7  
8  
9  
10  
11  
12  
13  
14  
15  
16  
17  
18  
19  
20  
21  
22  
23  
24  
25  
26  
27  
28  
29  
30  
31  
32  
33  
34  
35  
36  
37  
38  
39  
40  
41  
42  
43  
44  
45  
46  
47  
48  
49  
50  
51  
52  
53  
54  
55  
56  
57  
58  
59  
60

SCHOLARONE™  
Manuscripts

For peer review only

1  
2  
3 **THE CORONARY COMPUTED TOMOGRAPHIC ANGIOGRAPHY VISION**  
4  
5 **PROTOCOL: A PROSPECTIVE OBSERVATIONAL IMAGING COHORT**  
6  
7  
8 **STUDY IN PATIENTS UNDERGOING NONCARDIAC SURGERY**  
9

10 **T. Sheth<sup>a,\*</sup>, C. Butler<sup>b</sup>, B Chow<sup>c</sup>, MTV Chan<sup>d</sup>, A Mitha<sup>e</sup>, P Nagele<sup>f</sup>, V Tandon<sup>a</sup>,**  
11 **L Stewart<sup>g</sup>, M Graham<sup>b</sup>, GYS Choi<sup>d</sup>, T Kisten<sup>h</sup>, PK Woodard<sup>i</sup>, A Crean<sup>j</sup>, YF**  
12 **Abdul Aziz<sup>k</sup>, G Karthikeyan<sup>l</sup>, CK Chow<sup>m</sup>, W Szczeklik<sup>n</sup>, M Markobrada<sup>o</sup>, T.**  
13 **Mastracci<sup>p</sup>, PJ Devereaux<sup>q</sup> for the CTA VISION Investigators.**  
14  
15

16 <sup>a</sup> Department of Medicine, <sup>g</sup> Department of Radiology, and <sup>q</sup> Department of  
17 Clinical Epidemiology and Biostatistics, McMaster University, Hamilton, Canada  
18

19 <sup>b</sup> Division of Cardiology, University of Alberta, Edmonton, Canada  
20

21 <sup>c</sup> University of Ottawa Heart Institute, Department of Medicine (Cardiology) and  
22 Radiology, Ottawa, Ontario, Canada  
23  
24

25 <sup>d</sup> Department of Anesthesia and Intensive Care, The Chinese University of Hong  
26 Kong, Prince of Wales Hospital, Hong Kong  
27  
28

29 <sup>e</sup> Departments of Radiology and <sup>h</sup> Anesthesia, Inokusi Hospital, Durban, South  
30 Africa  
31

32 <sup>f</sup> Division of Clinical and Translational Research, Department of Anesthesiology, <sup>i</sup>  
33 Division of Radiology, Washington University, St. Louis, USA  
34  
35

36 <sup>j</sup> Division of Cardiology, University Health Network, Toronto, Canada  
37

38 <sup>k</sup> Department of Biomedical Imaging, University Malaya Research Imaging  
39 Centre, Kuala Lumpur, Malaysia  
40

41 <sup>l</sup> Division of Cardiology, All India Institute of Medical Sciences, New Delhi, India  
42

43 <sup>m</sup> Department of Cardiology, Westmead Hospital & The George Institute for  
44 Global Health, The University of Sydney, Sydney, Australia  
45

46 <sup>n</sup> Departments of Internal Medicine, Jagiellonian University Medical College,  
47 Krakow, Poland  
48

49 <sup>o</sup> Division of General Internal Medicine, University of Western Ontario, London,  
50 Canada  
51

52 <sup>p</sup> Endovascular and Vascular Surgery Department, Cleveland Clinic Foundation,  
53 Cleveland, USA  
54  
55

56 Conflicts of Interest: None declared  
57  
58  
59  
60

\*Corresponding Author: email address: [shetht@mcmaster.ca](mailto:shetht@mcmaster.ca)

## ABSTRACT

**Introduction:** At present, physicians have a limited ability to predict major cardiovascular complications after noncardiac surgery and little is known about the anatomy of coronary arteries associated with perioperative myocardial infarction. We have initiated the Coronary Computed Tomographic Angiography (CTA) VISION Study to (1) establish the predictive value of coronary CTA for perioperative myocardial infarction and death, and (2) describe the coronary anatomy of patients that have a perioperative myocardial infarction.

**Methods and Analysis:** The Coronary CTA VISION Study is prospective observational study. Preoperative coronary CTA will be performed in 1000-1500 patients with a history of vascular disease or at least 3 cardiovascular risk factors who are undergoing major elective noncardiac surgery. Serial troponin will be measured 6-12 hours after surgery and daily for the first 3 days after surgery. Major vascular outcomes at 30 days and 1 year after surgery will be independently adjudicated.

**Ethics and Dissemination:** Coronary CTA results in a measurable radiation exposure that is similar to a nuclear perfusion scan (10 to 12 mSV). Treating physicians will be blinded to the CTA results until 30 days after surgery in order to provide the most unbiased assessment of its prognostic capabilities. The only exception will be the presence of a left main stenosis >50%. This approach is supported by best available current evidence that, excluding left main disease, prophylactic revascularization prior to non-cardiac surgery does not improve

1  
2  
3 outcomes. An external safety and monitoring committee is overseeing the study  
4  
5 and will review outcome data at regular intervals. Publications describing the  
6  
7 results of the study will be submitted to major peer-reviewed journals and  
8  
9 presented at international medical conferences.  
10  
11  
12  
13  
14  
15  
16  
17  
18  
19

20 Key words: perioperative myocardial infarction, computed tomography,  
21  
22 prognosis, coronary artery disease  
23  
24  
25  
26  
27  
28

29 List of Abbreviations:  
30  
31

32 CTA: computed tomographic angiography  
33  
34

35 LAD: left anterior descending  
36  
37

38 ECG: electrocardiogram  
39  
40

41 CAD: coronary artery disease  
42  
43  
44  
45  
46  
47  
48  
49  
50  
51  
52  
53  
54  
55  
56  
57  
58  
59  
60

## INTRODUCTION

Globally over 200 million patients undergo major noncardiac surgery annually. Despite the benefits of surgery, annually over 5 million noncardiac surgery patients will suffer a cardiovascular death or nonfatal myocardial infarction in the first 30 days after surgery<sup>1</sup>.

### Limited Capacity to Predict Major Perioperative Ischemic Events

Accurate risk estimation is important to allow patients and physicians to make informed choices about the appropriateness of surgery and to inform perioperative management (e.g., anesthetic approach). Risk prediction based on clinical risk factors and functional capacity is suboptimal.<sup>2</sup> This is probably because many patients are inactive for substantial periods of time prior to their noncardiac surgery (e.g., orthopedic, vascular, and oncology patients) due to their underlying surgical condition, and as such, many patients with substantial coronary artery disease may not have experienced any suggestive symptoms.

In an attempt to improve preoperative risk prediction, some patients undergo non-invasive cardiac stress tests (e.g., stress echocardiography, nuclear scintigraphy imaging) prior to noncardiac surgery.<sup>3</sup> A recent meta-analysis evaluating these two tests demonstrated, however, that they have only moderate negative likelihood ratios (stress echocardiography 0.23 and stress perfusion imaging 0.44), and that more than a third of the patients who suffered a major perioperative cardiovascular event had a negative preoperative test result.<sup>4</sup> These data represent likely a best case scenario because most of the studies

1  
2  
3 have not assessed whether these non-invasive cardiac stress tests provide  
4  
5 independent prognostic information beyond known clinical variables. The few  
6  
7 studies that have undertaken multivariable regression analysis provide unreliable  
8  
9 estimates because they did not include all the known independent clinical  
10  
11 variables or the analysis had too few events for the number of variables  
12  
13 assessed.<sup>5-9</sup>  
14  
15  
16  
17  
18  
19

### 20 **Mechanisms of Perioperative Ischemic Events**

21  
22 Although perioperative myocardial infarction is the most common major  
23  
24 perioperative cardiac complication, little is known about its pathophysiology.<sup>3</sup>  
25  
26 Understanding the pathophysiology of perioperative myocardial infarction is  
27  
28 important to help inform which potential prophylactic interventions and acute  
29  
30 management interventions should be evaluated in randomized controlled trials to  
31  
32 improve the outcome of patients undergoing noncardiac surgery.  
33  
34  
35

36 A commonly proposed mechanism of perioperative myocardial infarction  
37  
38 relates to myocardial oxygen supply demand mismatch. Fluid shifts,  
39  
40 catecholamine surges, hypotension, anemia and hypoxia can occur during and  
41  
42 after major noncardiac surgery and transiently increase myocardial oxygen  
43  
44 demand.<sup>3</sup> In coronary vessels with high grade stenoses or occlusions, the  
45  
46 supply response may be limited, resulting in supply-demand mismatch  
47  
48 myocardial ischemia or infarction. An additional or alternative mechanism of  
49  
50 perioperative myocardial infarction is that the acute stress of surgery and  
51  
52 mechanical tissue injury induces a hypercoagulable state that increases the risk  
53  
54  
55  
56  
57  
58  
59  
60

1  
2  
3 of coronary thrombus formation at the site of a fissured plaque or with low  
4  
5 coronary flow.  
6  
7  
8  
9

## 10 **Rationale for use of Coronary Computed Tomographic Angiography (CTA)**

### 11 **Prior to Noncardiac Surgery**

12  
13  
14  
15 Coronary CTA may have several advantages for risk stratification prior to  
16  
17 noncardiac surgery. First, coronary CTA does not require exercise or  
18  
19 pharmacologic stress to detect coronary artery disease and therefore is well  
20  
21 suited to the vascular and orthopedic surgical populations who often cannot  
22  
23 exercise or take the necessary pharmacological agents (e.g., patients with  
24  
25 asthma). Second, coronary CTA can exclude obstructive coronary artery  
26  
27 disease very reliably as it has a high sensitivity for the detection of coronary  
28  
29 stenosis;<sup>10-13</sup>  
30  
31  
32  
33

34  
35 Third, coronary CTA is a very sensitive modality for the detection of high-  
36  
37 risk coronary anatomy (left main disease or three or two vessel disease including  
38  
39 the proximal left anterior descending [LAD] artery) as coronary CTA can visualize  
40  
41 these large proximal vessels very well.<sup>13</sup> Fourth, coronary CTA is the only non-  
42  
43 invasive modality that can detect non-obstructive atherosclerosis,<sup>14</sup> and some of  
44  
45 our research (e.g., POISE)<sup>15</sup> offers clues that non-obstructive coronary artery  
46  
47 disease may be responsible for a substantial proportion of the perioperative  
48  
49 myocardial infarctions that occur in the noncardiac surgery setting through  
50  
51 plaque rupture and thrombosis.  
52  
53  
54  
55  
56  
57  
58  
59  
60



1  
2  
3 Finally, coronary CTA can provide a comprehensive anatomic  
4  
5 characterization of the coronary arteries prior to surgery, and this has substantial  
6  
7 potential to shed important insight into the extent of preoperative coronary  
8  
9 atherosclerosis in culprit vessels that are associated with perioperative  
10  
11 myocardial infarction.  
12  
13

## 14 15 16 17 **OBJECTIVES OF THE CORONARY CTA VISION STUDY**

18  
19 The Coronary CTA VISION Study is a prospective cohort study that will  
20  
21 examine patients with, or at risk of, atherosclerotic disease who are undergoing  
22  
23 noncardiac surgery in order to determine: if preoperative coronary CTA has  
24  
25 additional predictive value, beyond clinical variables, for the occurrence of major  
26  
27 perioperative cardiac events (i.e., cardiovascular death and nonfatal myocardial  
28  
29 infarction) at 30 days after surgery; and the underlying coronary anatomy  
30  
31 associated with perioperative myocardial infarction. The Coronary CTA VISION  
32  
33 Study is a sub-study of the VISION Study. The Vascular events In noncardiac  
34  
35 Surgery patients cohort evaluation (VISION) Study is a 40,000 patient  
36  
37 international prospective cohort study that we are currently undertaking, and this  
38  
39 study is evaluating perioperative vascular complications in patients undergoing  
40  
41 noncardiac surgery.  
42  
43  
44  
45  
46  
47  
48  
49  
50  
51  
52

## 53 **METHODS**

### 54 55 **Study Design**

56  
57  
58  
59  
60

1  
2  
3 The Coronary CTA VISION Study is a prospective observational study of  
4 coronary CTA performed in patients prior to noncardiac surgery.  
5  
6  
7  
8  
9

### 10 **Study Population**

11  
12 The investigators will consider all patients undergoing elective noncardiac  
13 surgery for enrollment. Tables 1 and 2 present the study's inclusion and  
14 exclusion criteria.  
15  
16  
17  
18  
19

### 20 **Clinical Data Collection**

21  
22 After obtaining written informed consent, research personnel will interview  
23 and examine patients and review their charts to obtain information on patient  
24 characteristics that we are evaluating in the VISION Study to determine if they  
25 have potential independent predictors of major perioperative vascular events.  
26  
27 These variables include risk factors, co-morbidities, medications, anesthetic and  
28 surgical variables.  
29  
30  
31  
32  
33  
34  
35  
36  
37  
38  
39

### 40 **CTA Imaging Protocol**

41  
42 Once a patient is consented for the study, research personnel coordinate  
43 an appointment for the patient's preoperative coronary CTA scan. Personnel in  
44 the radiology department see patients prior to the coronary CTA scan and, when  
45 necessary, pre-treat the patients with beta-blockers (to achieve heart rate of 60  
46 or less) and nitroglycerin (at a dose of 0.6 to 0.8 mg administered sublingually) to  
47 optimize image quality. At centres with single source scanners, patients who  
48  
49  
50  
51  
52  
53  
54  
55  
56  
57  
58  
59  
60

1  
2  
3 continue to have a heart rate 70 bpm or greater despite beta-blockade are  
4  
5 excluded from the study (90bpm or greater with dual source scanners). In  
6  
7 patients with asthma, personnel use a calcium channel blocker (diltazem 30 to  
8  
9 120 mg) is used to achieve heart rate control. A non-contrast scan is performed  
10  
11 first. This scan is prospectively triggered at 75% of the RR interval, with 0.4 to  
12  
13 0.625 slice thickness (depending on scanner type) and 3mm increments.  
14  
15 Technicians next perform a contrast scan and inject contrast agent at a rate of  
16  
17 5.5 to 7 ml/s depending on body habitus of the patient being scanned. For an  
18  
19 average patient, the dose of contrast is expected to be approximately 80 ml. The  
20  
21 contrast scan is retrospectively gated or prospectively triggered with 0.4 to 0.625  
22  
23 slice thickness (depending on scanner type). On scanners with the capacity for  
24  
25 prospective triggering, studies are acquired with this technique whenever heart  
26  
27 rate is adequately controlled (HR<65) and regular. For retrospective  
28  
29 acquisitions, dose modulation is used to minimize radiation dose.  
30  
31  
32  
33  
34  
35  
36  
37  
38

39 Standard initial reconstruction of the coronary CTA data set is performed  
40  
41 at 75% of the R-R interval, with additional reconstructions performed as required  
42  
43 for image interpretation. When retrospective gating is used, reconstructions for  
44  
45 functional assessment are performed in 10 phases with 10% increments.  
46  
47  
48  
49

## 50 **Participating Sites**

51  
52  
53 Participating centres have a 64 detector MDCT or greater with the  
54  
55 capacity to perform cardiac CT, an expert reader in cardiology or radiology (as  
56  
57  
58  
59  
60

1  
2  
3 defined by AHA/ACC training standards or their international equivalent) and a  
4  
5 strong collaboration between the imaging team and the clinical peri-operative  
6  
7 medicine service to facilitate patient recruitment. The participating sites are listed  
8  
9 in the Appendix. Each participating site submits several scans to confirm  
10  
11 adherence to the study imaging protocol and achievement of adequate image  
12  
13 quality prior to initiation of study recruitment.  
14  
15  
16  
17  
18  
19

### 20 **CTA Interpretation and Blinding**

21  
22 Coronary CTA is read by an expert radiologist or cardiologist. These  
23  
24 individuals read each coronary CTA exam without knowledge of the clinical data.  
25  
26 They report findings for each vessel, in terms of nature of plaque and extent of  
27  
28 narrowing, and they determine whether each of the following 4 findings are  
29  
30 present on the coronary CTA: (1) normal – no evidence of coronary  
31  
32 atherosclerotic plaque (this excludes subsequent findings), (2) non-obstructive  
33  
34 coronary artery disease – evidence of at least one coronary artery plaque with a  
35  
36 <50% stenosis, (3) obstructive coronary artery disease – at least one coronary  
37  
38 artery plaque with a  $\geq 50\%$  stenosis, or (4) obstructive plaque with high-risk  
39  
40 anatomy ( $\geq 50\%$  stenosis of the left main,  $\geq 50\%$  stenosis in three coronary  
41  
42 arteries, or  $\geq 50\%$  stenosis in two coronary arteries including the proximal left  
43  
44 anterior descending [LAD] artery). Where calcium and/or motion artifacts limit  
45  
46 interpretability, the segment are identified as non-evaluable and a forced  
47  
48 interpretation on the presence of stenosis is made. If there are more than 4 non-  
49  
50  
51  
52  
53  
54  
55  
56  
57  
58  
59  
60

1  
2  
3  
4  
5  
6  
7  
8  
9  
10  
11  
12  
13  
14  
15  
16  
17  
18  
19  
20  
21  
22  
23  
24  
25  
26  
27  
28  
29  
30  
31  
32  
33  
34  
35  
36  
37  
38  
39  
40  
41  
42  
43  
44  
45  
46  
47  
48  
49  
50  
51  
52  
53  
54  
55  
56  
57  
58  
59  
60

evaluable segments, the scan is considered non-diagnostic and excluded from the analysis.

The classification of CTA findings being used in CTA VISION predicts the risk of mortality over 1-2 years in patients with stable coronary artery disease in the non-operative setting,<sup>16</sup> similar to the results of the well validated prognostic classification of invasive coronary angiography that puts increased importance on the number of vessels with  $\geq 50\%$  stenoses, with particular emphasis on involvement of the proximal LAD.<sup>17</sup> Assessment of stenosis severity into board categories (i.e., 50-70% versus  $\geq 70\%$ ) demonstrates very good agreement between coronary CTA and invasive angiography (kappa =0.74).<sup>18</sup> The reader calculates a calcium score using the Agatston method using the non-contrast scan.<sup>19</sup> This score is recorded and is available for subsequent analyses.

If a patient is discovered to have a  $\geq 50\%$  stenosis of the left main we immediately provide this test result to the patient's physicians. All other patients have their results withheld from the clinical care team until 30 days after surgery.

### **Patient Follow-up**

After surgery, patients have a troponin measurement drawn 6 to 12 hours after surgery and on the 1<sup>st</sup>, 2<sup>nd</sup>, and 3<sup>rd</sup> days after surgery. Standard orders ensure these tests are undertaken. Orders also ensure that an electrocardiogram is undertaken immediately after an elevated troponin measurement is detected. Patients who are discovered to have an elevated troponin with or without ECG changes will usually undergo an echocardiogram or

1  
2  
3 a functional evaluation such as nuclear perfusion imaging or stress MRI. Where  
4  
5 clinically indicated, invasive coronary angiography is performed.  
6  
7

8 Research personnel follow patients throughout their time in hospital and  
9  
10 personally evaluate patients and review their medical records ensuring study  
11  
12 orders have been followed and noting any primary or secondary outcomes. The  
13  
14 research personnel contact patients by phone at 30 days and 1 year post  
15  
16 surgery. If patients indicate that they have experienced an outcome or  
17  
18 hospitalization, the research personnel contact their physicians to obtain the  
19  
20 appropriate documentation.  
21  
22  
23  
24  
25  
26

### 27 **Study Outcomes**

28  
29 For our first objective (i.e., to determine if preoperative coronary CTA has  
30  
31 additional predictive value beyond clinical variables) our primary outcome is a  
32  
33 major cardiac event (i.e., a composite of cardiovascular death and nonfatal  
34  
35 myocardial infarction) at 30 days post surgery. Individual secondary outcomes  
36  
37 for our first objective at 1 year after surgery include cardiovascular death,  
38  
39 myocardial infarction, and coronary revascularization. For our second objective  
40  
41 (i.e., to determine the underlying coronary anatomy associated with perioperative  
42  
43 myocardial infarction) our primary and only outcome is myocardial infarction at 30  
44  
45 days after surgery.  
46  
47  
48  
49

50 The first step in determining the underlying coronary artery anatomy  
51  
52 associated with a perioperative myocardial infarction is to determine the region of  
53  
54 the myocardial infarction using a combination of clinical and non-invasive tests.  
55  
56  
57  
58  
59  
60

1  
2  
3 Two cardiologists blinded to the CTA results will independently determine this  
4  
5 using a pre-specified algorithm based on literature and expert opinion (Table 3).  
6  
7  
8 After establishing this, we then look at what the expert CTA evaluators stated  
9  
10 was the underlying coronary artery anatomy (e.g., <50% stenosis, 50 to 69%  
11  
12 stenosis, and  $\geq 70\%$  stenosis) in the coronary artery that supplied the region of  
13  
14 the myocardial infarction.  
15  
16

### 17 18 19 20 **Outcome Adjudication**

21  
22 A committee of clinicians who are blinded to the CTA results adjudicate  
23  
24 the outcomes of death and myocardial infarction. We will use the decisions from  
25  
26 the Adjudication Committee for all statistical analyses.  
27  
28

### 29 30 31 **Sample size**

32  
33 Our sample size calculation is based upon our primary objective (i.e., to  
34  
35 determine if preoperative coronary CTA has additional predictive value beyond  
36  
37 clinical variables). Of our 2 objectives, this objective requires the largest number  
38  
39 of patients to ensure the stability of the prediction model. The VISION Study will  
40  
41 determine the optimal clinical risk prediction model, and we will then undertake a  
42  
43 multivariable analysis to determine if the coronary CTA results have additional  
44  
45 predictive value beyond the VISION clinical risk prediction model. Simulation  
46  
47 studies demonstrate that logistic models require 12 to 15 events per predictor to  
48  
49 produce stable estimates.<sup>20-21</sup> We will evaluate 4 potential predictors in our  
50  
51 multivariable analysis: 1 VISION clinical risk prediction score, and 3 types of  
52  
53  
54  
55  
56  
57  
58  
59  
60

1  
2  
3 coronary CTA results (i.e., non-obstructive CAD, obstructive CAD, and  
4  
5 obstructive plaque with high-risk anatomy) with 1 reference category (normal).  
6  
7 Given our eligibility criteria, we expect that the study participants will be evenly  
8  
9 distributed across the 4 CTA result groups.  
10  
11

12  
13 Based upon the VISION Pilot Study and a previous non-invasive cardiac  
14  
15 testing study that we undertook in a similar surgical population,<sup>22</sup> we expect a 6%  
16  
17 event rate for major perioperative cardiac events in this study. Table 4 presents  
18  
19 the various sample sizes needed to test 4 variables in a multivariable analysis  
20  
21 based upon various event rates and the required number of events per variable.  
22  
23 As the table indicates, if our event rate is 6% we will need 1000 patients to  
24  
25 achieve stable estimates. If our event rate is 4%, we may need up to 1500  
26  
27 patients. We are targeting a sample size of 1500 patients but this may change  
28  
29 depending on our event rate at 1000 patients.  
30  
31  
32  
33  
34  
35  
36

### 37 **Data analysis**

38  
39 To address our primary objective, we will undertake a multivariable logistic  
40  
41 regression analysis in which the dependent variable is a major perioperative  
42  
43 cardiac event at 30 days after surgery and the independent variables are the  
44  
45 VISION clinical risk prediction score and the 4 coronary CTA results discussed  
46  
47 above. For this logistic regression analysis we will use forced simultaneous entry  
48  
49 (all candidate variables will remain in the model) as opposed to automated  
50  
51 stepwise selection, because simulation studies have demonstrated a higher risk  
52  
53 of overfitting with the latter approach.<sup>23-24</sup> To assess the reliability of our models  
54  
55  
56  
57  
58  
59  
60



1  
2  
3 we will undertake bootstrapping,<sup>25</sup> because this technique is superior to cross-  
4 validation and jack-knife techniques.<sup>26</sup> We will test the hypothesis that coronary  
5 CTA will have additional predictive value, beyond clinical variables, for the  
6 occurrence of major perioperative cardiac events in patients undergoing  
7 noncardiac surgery using the likelihood ratio (LR) test:  $LR\ test = -2\ln(L1/L2)$   
8 where L1 and L2 are the likelihood for the reduced model with VISION score  
9 alone, and likelihood for the full model with both VISION score and CTA  
10 variables.<sup>27</sup>  
11  
12  
13  
14  
15  
16  
17  
18  
19  
20  
21

22 For the logistic model we will report the odds ratios [OR], 95% confidence  
23 intervals, and associated p-values. For all tests, we will use alpha = 0.05 level of  
24 significance. For all significant associations we will report the likelihood ratio and  
25 the 95% confidence interval.  
26  
27  
28  
29  
30

31 Examination of residuals will provide an assessment of model  
32 assumptions for regression analyses. Goodness-of-fit for the models will be  
33 performed using appropriate Hosmer-Lemeshov tests. For the multivariable  
34 regression analysis, multicollinearity (correlations among predictor variables)  
35 may exist.<sup>28</sup> We will assess colinearity using the variance inflation factor (VIF)  
36 which measures the extent to which the variance of the model coefficients will be  
37 inflated (because of the correlation of the variable with other predictor variables)  
38 if that variable is included in the model. We will consider variables with VIF >10  
39 colinear and we will exclude one of these variables from the analysis.<sup>29</sup>  
40  
41  
42  
43  
44  
45  
46  
47  
48  
49  
50  
51

52 For our secondary objective we will determine the proportion of patients  
53 suffering a perioperative myocardial infarction who on their coronary CTA the  
54  
55  
56  
57  
58  
59  
60

1  
2  
3 myocardial infarction associated artery had a coronary artery stenosis of <50%,  
4  
5 50-69%, ≥70-99%, 100%, or no coronary artery stenosis and the associated 95%  
6  
7 confidence intervals. We will perform all analyses using SAS version 9.2 (Cary,  
8  
9 North Carolina).  
10  
11

## 12 13 14 15 **Ethics**

16  
17 Coronary CTA results in a measurable radiation exposure. Volume  
18  
19 coverage of the whole heart using standard acquisition parameters will  
20  
21 approximately result in an effective dose of 10 to 12 mSv if retrospectively gated  
22  
23 CTA is performed. The dose will likely be substantially lower if prospectively  
24  
25 triggered CTA is performed. The maximum anticipated does is similar to a  
26  
27 nuclear perfusion scan (8 to 12 mSv), but greater than a standard chest CT (5 to  
28  
29 7 mSv)<sup>30</sup> and equals 3 to 4 years of the annual average effective dose from  
30  
31 background radiation (3.6 mSv/year) or approximately 20 % of the annual whole  
32  
33 body effective dose that is allowed for a radiation worker (radiologist, radiological  
34  
35 technologist) (50 mSv/year).<sup>31</sup>  
36  
37  
38  
39

40  
41 We feel that blinding of treating physicians to the coronary CTA findings is  
42  
43 important to provide the most unbiased assessment of its prognostic capabilities.  
44  
45 Thus, in keeping with prior studies that evaluated non-invasive tests in patients  
46  
47 undergoing vascular surgery,<sup>32-33</sup> the attending surgeons and consultants in our  
48  
49 study will not know the results of the pre-operative coronary CTA. The best  
50  
51 evidence presently available from the CARP Trial<sup>34</sup> and DECREASE-V Trial<sup>35</sup>  
52  
53 suggests that there is no benefit to prophylactic coronary revascularization prior  
54  
55  
56  
57  
58  
59  
60

1  
2  
3 to non-cardiac surgery and therefore, the CTA results are not required to guide  
4  
5 treatment prior to non-cardiac surgery. In the CARP Trial one-third of the  
6  
7 patients had 3 vessel coronary artery disease,<sup>34</sup> and in the DECREASE-V Trial  
8  
9 67% of the patients had 3 vessel coronary artery disease.<sup>35</sup> The only exception  
10  
11 is hemodynamically significant left main disease which was excluded in the  
12  
13 CARP trial. Thus, if the coronary CTA suggests significant left main disease, the  
14  
15 results will be immediately disclosed to the treating physicians. For all patients in  
16  
17 the study, the results of coronary CTA will be provided to all family physicians,  
18  
19 internal medicine, and cardiology consultants involved in the care of the patients  
20  
21 at 30 days post surgery.  
22  
23  
24  
25  
26  
27  
28

29 An external safety and monitoring committee (ESMC) will convene early in  
30  
31 the study and will meet again at regular intervals. Interim analyses will be  
32  
33 conducted when approximately 25%, 50%, and 75% of the expected events have  
34  
35 occurred and the data are available. The analyses will be conducted on the total  
36  
37 of adjudicated and unadjudicated events at the appropriate time points. If the  
38  
39 ESCMC decides that a definitive conclusion has been reached for the overall study  
40  
41 population or a specific subgroup, they will immediately unblind the Co-Principal  
42  
43 Investigators and discuss the results together.  
44  
45  
46  
47  
48  
49

## 50 **Conclusion**

51  
52  
53 Coronary CTA is a novel application of CT scanning with potentially  
54  
55 important clinical applications. This study will evaluate the role of coronary CTA  
56  
57  
58  
59  
60

1  
2  
3 in risk stratification prior to noncardiac surgery. If we demonstrate that CTA has  
4  
5 important additional predictive value beyond clinical information in patients  
6  
7  
8 undergoing elective noncardiac surgery, this finding would allow this test to  
9  
10 facilitate informed patient decision-making about the risks of surgery and guide  
11  
12 perioperative patient management. This study will also provide insights into the  
13  
14 underlying coronary anatomy of coronary arteries that cause myocardial  
15  
16 infarction in the perioperative setting. This knowledge will inform the selection of  
17  
18 targeted prevention and management interventions to evaluate in large  
19  
20 perioperative randomized controlled trials. Considering that over 200 million  
21  
22 adults undergo major noncardiac surgery annually and that we know little about  
23  
24 how to predict or manage major perioperative cardiac events, highlights the  
25  
26 importance of the Coronary CTA VISION Study.  
27  
28  
29  
30  
31  
32  
33  
34  
35  
36  
37  
38  
39  
40  
41  
42  
43  
44  
45  
46  
47  
48  
49  
50  
51  
52  
53  
54  
55  
56  
57  
58  
59  
60

## References

1. Devereaux PJ, Chan M, Eikelboom J. Major vascular complications in patients undergoing noncardiac surgery: The magnitude of the problem, risk prediction, surveillance, and prevention. In: Yusuf S, Cairns JA, Camm AJ, Fallen EL, Gersh BJ, editors. *Evidence based Cardiology*. 3rd ed. London, England: BMJ Books, 2009:47-62.
2. Devereaux PJ, Yang H, Yusuf S, et al. Effects of extended-release metoprolol succinate in patients undergoing non-cardiac surgery (POISE trial): a randomized controlled trial. *Lancet* 2008;371(9627):1839-47.
3. Devereaux PJ, Goldman L, Cook DJ, et al. Perioperative cardiac events in patients undergoing noncardiac surgery: a review of the magnitude of the problem, the pathophysiology of the events and methods to estimate and communicate risk. *CMAJ* 2005;173(6):627-34.
4. Beattie WS, Abdelnaem E, Wijeyesundera DN, et al. A meta-analytic comparison of preoperative stress echocardiography and nuclear scintigraphy imaging. *Anesth Analg* 2006;102(1):8-16.
5. Vanzetto G, Machecourt J, Blendea D, et al. Additive value of thallium single-photon emission computed tomography myocardial imaging for prediction of perioperative events in clinically selected high cardiac risk patients having abdominal aortic surgery. *Am J Cardiol* 1996;77(2):143-8.

- 1  
2  
3 6. Coley CM, Field TS, Abraham SA, et al. Usefulness of dipyridamole-thallium  
4 scanning for preoperative evaluation of cardiac risk for nonvascular surgery. Am  
5 J Cardiol 1992;69(16):1280-5.  
6  
7
- 8  
9  
10  
11 7. Brown KA, Rowen M. Extent of jeopardized viable myocardium determined by  
12 myocardial perfusion imaging best predicts perioperative cardiac events in  
13 patients undergoing noncardiac surgery. J Am Coll Cardiol 1993;21(2):325-30.  
14  
15
- 16  
17  
18  
19 8. Boersma E, Poldermans D, Bax JJ, et al. Predictors of cardiac events after  
20 major vascular surgery: Role of clinical characteristics, dobutamine  
21 echocardiography, and beta-blocker therapy. JAMA 2001;285(14):1865-73.  
22  
23
- 24  
25  
26  
27 9. Poldermans D, Arnese M, Fioretti PM, et al. Improved cardiac risk stratification  
28 in major vascular surgery with dobutamine-atropine stress echocardiography. J  
29 Am Coll Cardiol 1995;26(3):648-53.  
30  
31
- 32  
33  
34  
35 10. Mollet NR, Cademartiri F, Krestin GP, et al. Improved diagnostic accuracy  
36 with 16-row multi-slice computed tomography coronary angiography. J Am Coll  
37 Cardiol 2005;45(1):128-32.  
38  
39
- 40  
41  
42  
43 11. Raff GL, Gallagher MJ, O'Neill WW, et al. Diagnostic accuracy of noninvasive  
44 coronary angiography using 64-slice spiral computed tomography. J Am Coll  
45 Cardiol 2005;46(3):552-7.  
46  
47
- 48  
49  
50  
51 12. Leschka S, Alkadhi H, Plass A, et al. Accuracy of MSCT coronary  
52 angiography with 64-slice technology: first experience. Eur Heart J  
53  
54  
55  
56 2005;26(15):1482-7.  
57  
58  
59  
60

1  
2  
3 13. Sheth T, Amlani S, Ellins ML, et al. CT coronary angiographic assessment of  
4 high risk coronary anatomy in patients with suspected coronary artery disease  
5 and intermediate pre-test probability. Am Heart J 2008:in press.  
6  
7

8  
9  
10  
11 14. Butler J, Shapiro M, Reiber J, et al. Extent and distribution of coronary artery  
12 disease: a comparative study of invasive versus noninvasive angiography with  
13 computed angiography. Am Heart J 2007;153(3):378-84.  
14  
15

16  
17  
18  
19 15. Effects of extended-release metoprolol succinate in patients undergoing non-  
20 cardiac surgery (POISE trial): a randomized controlled trial. Lancet 2008.  
21  
22

23  
24  
25 16. Min JK, Shaw LJ, Devereux RB, et al. Prognostic value of multidetector  
26 coronary computed tomographic angiography for prediction of all-cause mortality.  
27 J Am Coll Cardiol 2007;50(12):1161-70.  
28  
29

30  
31  
32  
33 17. Califf RM, Phillips HR, 3rd, Hindman MC, et al. Prognostic value of a  
34 coronary artery jeopardy score. J Am Coll Cardiol 1985;5(5):1055-63.  
35  
36

37  
38  
39 18. Cury RC, Ferencik M, Achenbach S, Pomerantsev E, Nieman K, Moselewski  
40 F, et al. Accuracy of 16-slice multi-detector CT to quantify the degree of coronary  
41 artery stenosis: assessment of cross-sectional and longitudinal vessel  
42 reconstructions. Eur J Radiol 2006;57(3):345-50.  
43  
44  
45

46  
47  
48  
49 19. Agatston AS, Janowitz WR, Hildner FJ, et al. Quantification of coronary  
50 artery calcium using ultrafast computed tomography. J Am Coll Cardiol  
51  
52  
53 1990;15:827-32.  
54  
55

- 1  
2  
3 20. Babyak MA. What you see may not be what you get: a brief, nontechnical  
4 introduction to overfitting in regression-type models. *Psychosom Med*  
5  
6 2004;66(3):411-21.  
7  
8  
9  
10  
11 21. Peduzzi P, Concato J, Kemper E, et al. A simulation study of the number of  
12 events per variable in logistic regression analysis. *J Clin Epidemiol*  
13 1996;49(12):1373-9.  
14  
15  
16  
17  
18 22. Gulenchyn KY, Montgomery AG, Sumner G, et al. A pilot study evaluating the  
19 predictive value of noninvasive pharmacological cardiovascular stress testing  
20 before orthopaedic surgery. [Abstract]. *J Nucl Cardiol* 2007;14:S3.  
21  
22  
23  
24  
25  
26  
27 23. Derksen S, Keselman H. Backward, forward and stepwise automated subset  
28 selection algorithms: frequency of obtaining authentic and noise variables. *Br J*  
29 *Math Stat Psychol* 1992;45:265-282.  
30  
31  
32  
33  
34  
35 24. Steyerberg EW, Eijkemans MJ, Harrell FE, Jr. et al. Prognostic modeling with  
36 logistic regression analysis: in search of a sensible strategy in small data sets.  
37 *Med Decis Making* 2001;21(1):45-56.  
38  
39  
40  
41  
42  
43 25. Efron B, Tibshirani R. An introduction to the bootstrap. London: Chapman &  
44 Hall, 2003.  
45  
46  
47  
48  
49 26. Gong G. Cross-validation, the jackknife and the bootstrap: excess error  
50 estimation in forward logistic regression. *J Am Stat Assoc* 1986;81:108-113.  
51  
52  
53  
54 27. Kleinbaum D, Klein M. Logistic Regression. 2nd Edition ed. NY: Springer-  
55 Verlag, 2002.  
56  
57  
58  
59  
60



- 1  
2  
3 28. Wax Y. Collinearity diagnosis for a relative risk regression analysis: an  
4 application to assessment of diet-cancer relationship in epidemiological studies.  
5  
6 Stat Med 1992;11(10):1273-87.  
7  
8  
9  
10  
11 29. Kline R. Data preparation and screening. In: Kline R, editor. Principles and  
12 Practice of Structural Equation Modeling. New York: The Guilford Press,  
13  
14 1998:67-94.  
15  
16  
17  
18  
19 30. Hunold P, Vogt FM, Schmermund A, et al. Radiation exposure during cardiac  
20 CT: effective doses at multi-detector row CT and electron-beam CT. *Radiology*  
21  
22 2003;226(1):145-52.  
23  
24  
25  
26  
27 31. Jakobs TF, Becker CR, Ohnesorge B, et al. Multislice helical CT of the heart  
28 with retrospective ECG gating: reduction of radiation exposure by ECG-controlled  
29 tube current modulation. *Eur Radiol* 2002;12(5):1081-6.  
30  
31  
32  
33  
34  
35 32. Vanzetto G, Machecourt J, Blendea D, et al. Additive value of thallium single-  
36 photon emission computed tomography myocardial imaging for prediction of  
37 perioperative events in clinically selected high cardiac risk patients having  
38 abdominal aortic surgery. *Am J Cardiol* 1996;77(2):143-8.  
39  
40  
41  
42  
43  
44  
45 33. de Virgilio C, Toosie K, Elbassir M, et al. Dipyridamole-thallium/sestamibi  
46 before vascular surgery: a prospective blinded study in moderate-risk patients. *J*  
47  
48 *Vasc Surg* 2000;32(1):77-89.  
49  
50  
51  
52  
53 34. McFalls EO, Ward HB, Moritz TE, et al. Coronary-artery revascularization  
54 before elective major vascular surgery. *N Engl J Med* 2004;351(27):2795-804.  
55  
56  
57  
58  
59  
60

1  
2  
3 35. Poldermans D, Schouten O, Vidakovic R, et al. A clinical randomized trial to  
4 evaluate the safety of a noninvasive approach in high-risk patients undergoing  
5 major vascular surgery: the DECREASE-V Pilot Study. *J Am Coll Cardiol*  
6  
7  
8 2007;49(17):1763-9.  
9  
10  
11  
12  
13  
14  
15  
16  
17  
18  
19  
20  
21  
22  
23  
24  
25  
26  
27  
28  
29  
30  
31  
32  
33  
34  
35  
36  
37  
38  
39  
40  
41  
42  
43  
44  
45  
46  
47  
48  
49  
50  
51  
52  
53  
54  
55  
56  
57  
58  
59  
60

For peer review only

**Table 1. Inclusion Criteria****All patients undergoing elective noncardiac surgery are eligible if they:**

- are > 45 years of age
- require at least an overnight hospital admission after surgery
- are undergoing one of the following surgeries
  - orthopedic (major joint arthroplasty)
  - vascular
  - thoracic surgery (pneumonectomy, lobectomy, other thoracic – wedge lung resection, mediastinal tumor resection, major chest wall resection)
  - major abdominal surgery (partial or total colectomy, stomach surgery, visceral resection, cytoreductive surgery, radical hysterectomy, radical prostatectomy)
  - major organ transplantation (kidney, liver, lung)
- have enough time prior to noncardiac surgery to obtain a coronary CTA study
- fulfill one of the following additional criteria:
  - history of coronary artery disease
  - history of peripheral vascular disease
  - history of stroke
  - history of a physician diagnosis of congestive heart failure; OR
  - any 3 of the following 6 risk factors: (a) diabetes and currently on an oral diabetic drug or insulin therapy, (b) age  $\geq 70$  years, (c) history of smoking within 2 years of surgery, (d) history of treatment for hypercholesterolemia, (e) history of a transient ischemic attack (TIA), or (f) a history of hypertension.

**Table 2. Exclusion Criteria****All patients are excluded if they:**

- are referred to invasive coronary angiography prior to noncardiac surgery (coronary CTA will not provide information incremental to an invasive angiogram)
- have had a prior percutaneous coronary intervention (PCI) with stent implantation (due to limited ability of coronary CTA to evaluate stents)
- have a creatinine clearance <35 ml/min (to avoid risk of contrast nephrotoxicity in patients potentially at risk)
- have a known contrast reaction
- are pregnant
- have persistent atrial fibrillation or >2 atrial or ventricular premature beats on a preoperative 12 lead electrocardiogram (ECG) (suboptimal image quality results from irregular heart rhythms at cardiac CT due to difficulties with retrospective gating)
- weight >300 lbs (obese patients have suboptimal image quality due to a poor contrast to noise ratio)
- have an inability to achieve the required heart rate prior to coronary CTA despite medication (i.e., a beta-blocker or calcium channel blocker) if the patient will be scanned on a single source scanner they require a heart rate <70 beats per minute (bpm) or a heart rate <90 bpm if the patient will be scanned on a dual source scanner; or
- patients who do not undergo noncardiac surgery within 6 months of their coronary CTA.

**Table 3: Diagnostic confidence in determination of culprit lesion in patients who fulfill our definition of myocardial infarction**

| Diagnostic confidence              | Criteria                                                                                                                                                                                                                                                                                                                                                                                                                                                                                                                                                     |
|------------------------------------|--------------------------------------------------------------------------------------------------------------------------------------------------------------------------------------------------------------------------------------------------------------------------------------------------------------------------------------------------------------------------------------------------------------------------------------------------------------------------------------------------------------------------------------------------------------|
| Highly probable location of lesion | <ul style="list-style-type: none"> <li>• Thrombus or features of recent plaque rupture (irregular margins, hazy appearance, dissection) coronary plaque fissure seen on invasive angiography; OR</li> <li>• New area of infarction on cardiac MRI</li> </ul>                                                                                                                                                                                                                                                                                                 |
| Probable location of lesion        | <ul style="list-style-type: none"> <li>• New perfusion abnormality identified on SPECT testing</li> <li>• New wall motion abnormality (as determined through comparison of pre and postoperative echocardiography or MRI;</li> <li>• New wall motion abnormality as determined through comparison of preoperative CTA myocardial function and postoperative echocardiography; OR</li> <li>• New Q waves in 2 contiguous leads on the patients ECG</li> </ul>                                                                                                 |
| Possible location of lesion        | <ul style="list-style-type: none"> <li>• ST segment elevation [<math>\geq 2</math> mm in leads V<sub>1</sub>, V<sub>2</sub>, or V<sub>3</sub> OR <math>\geq 1</math> mm in the other leads] in two contiguous leads;</li> <li>• ST segment depression [<math>\geq 1</math> mm] in two contiguous leads;</li> <li>• Symmetric inversion of T waves (<math>\geq 1</math> mm) in at least two contiguous leads; OR</li> <li>• Presumed new cardiac wall motion abnormality on echocardiography</li> <li>• Presumed new fixed defect on SPECT testing</li> </ul> |

**Table 4: Sample size needed to test 4 variables in a multivariable analysis based upon various event rates and the required number of events per variable**

| Required number of events per variable | Number of events needed | Sample size needed to test 4 variables in a multivariable analysis based upon various event rates |      |
|----------------------------------------|-------------------------|---------------------------------------------------------------------------------------------------|------|
|                                        |                         | 4%                                                                                                | 6%   |
| 10                                     | 40                      | 1000                                                                                              | 667  |
| 12                                     | 48                      | 1200                                                                                              | 800  |
| 15                                     | 60                      | 1500                                                                                              | 1000 |

## Appendix

Co- Principal Investigators: T. Sheth, PJ Devereaux

Co-ordinating Centre: S. Pettit, E. Wendland, D. Heels- Ansdell

External Safety and Monitoring Committee: V. Montori (Chair), N. Valettas, K. Thorlund

## Investigators

Hamilton, Canada: L. Stewart, V. Tandon, M Ferri.

Ottawa, Canada: B. Chow, P. Jetty

Edmonton, Canada: C. Butler, R. Coulden, M. Graham, M. Jacka

Hong Kong, China: M. Chan, GYS. Choi

Durban, South Africa: A. Mitha, T. Kisten, B. Biccard, R. Rodseth

St. Louis, USA: P. Nagele, P. Woodard

Toronto, Canada: A. Crean

Kuala Lumpur, Malaysia: C. Wang, YF Abdul Aziz, R. Sandhu

Sydney, Australia: CK. Chow

New Delhi, India: G. Karthikeyan, G. Gulati

London, Canada: M. Markobrada, A. Islam, A. Goela

Krakow, Poland: W. Szczeklik, T. Miszalski-Jamka, B. Sokolowska

Cleveland, USA: T. Mastracci, M. Desai

## Funding

This work is supported by grants from Canadian Institutes of Health Research, the Hamilton Health Sciences New Investigator Fund, the McMaster University Division of Cardiology, the University of Western Ontario Department of Radiology and the University of Western Ontario Division of General Internal Medicine. The study funders have not role in study design, data collection, data

1  
2  
3  
4  
5  
6  
7  
8  
9  
10  
11  
12  
13  
14  
15  
16  
17  
18  
19  
20  
21  
22  
23  
24  
25  
26  
27  
28  
29  
30  
31  
32  
33  
34  
35  
36  
37  
38  
39  
40  
41  
42  
43  
44  
45  
46  
47  
48  
49  
50  
51  
52  
53  
54  
55  
56  
57  
58  
59  
60

analysis and interpretation, drafting of manuscripts or the decision to submit the report for publication. There are no conflicts to declare.

For peer review only



1  
2  
3 **THE CORONARY COMPUTED TOMOGRAPHIC ANGIOGRAPHY VISION**  
4  
5 **PROTOCOL: A PROSPECTIVE OBSERVATIONAL IMAGING COHORT**  
6  
7  
8 **STUDY IN PATIENTS UNDERGOING NONCARDIAC SURGERY**  
9

10 **T. Sheth<sup>a,\*</sup>, C. Butler<sup>b</sup>, B Chow<sup>c</sup>, MTV Chan<sup>d</sup>, A Mitha<sup>e</sup>, P Nagele<sup>f</sup>, V Tandon<sup>a</sup>,**  
11 **L Stewart<sup>g</sup>, M Graham<sup>b</sup>, GYS Choi<sup>d</sup>, T Kisten<sup>h</sup>, PK Woodard<sup>i</sup>, A Crean<sup>j</sup>, YF**  
12 **Abdul Aziz<sup>k</sup>, G Karthikeyan<sup>l</sup>, CK Chow<sup>m</sup>, W Szczeklik<sup>n</sup>, M Markobrada<sup>o</sup>, T.**  
13 **Mastracci<sup>p</sup>, PJ Devereaux<sup>q</sup> for the CTA VISION Investigators.**  
14  
15

16 <sup>a</sup> Department of Medicine, <sup>g</sup> Department of Radiology, and <sup>q</sup> Department of  
17 Clinical Epidemiology and Biostatistics, McMaster University, Hamilton, Canada  
18

19 <sup>b</sup> Division of Cardiology, University of Alberta, Edmonton, Canada  
20

21 <sup>c</sup> University of Ottawa Heart Institute, Department of Medicine (Cardiology) and  
22 Radiology, Ottawa, Ontario, Canada  
23  
24

25 <sup>d</sup> Department of Anesthesia and Intensive Care, The Chinese University of Hong  
26 Kong, Prince of Wales Hospital, Hong Kong  
27  
28

29 <sup>e</sup> Departments of Radiology and <sup>h</sup> Anesthesia, Inokusi Hospital, Durban, South  
30 Africa  
31

32 <sup>f</sup> Division of Clinical and Translational Research, Department of Anesthesiology, <sup>i</sup>  
33 Division of Radiology, Washington University, St. Louis, USA  
34  
35

36 <sup>j</sup> Division of Cardiology, University Health Network, Toronto, Canada  
37

38 <sup>k</sup> Department of Biomedical Imaging, University Malaya Research Imaging  
39 Centre, Kuala Lumpur, Malaysia  
40

41 <sup>l</sup> Division of Cardiology, All India Institute of Medical Sciences, New Delhi, India  
42

43 <sup>m</sup> Department of Cardiology, Westmead Hospital & The George Institute for  
44 Global Health, The University of Sydney, Sydney, Australia  
45

46 <sup>n</sup> Departments of Internal Medicine, Jagiellonian University Medical College,  
47 Krakow, Poland  
48

49 <sup>o</sup> Division of General Internal Medicine, University of Western Ontario, London,  
50 Canada  
51

52 <sup>p</sup> Endovascular and Vascular Surgery Department, Cleveland Clinic Foundation,  
53 Cleveland, USA  
54  
55

56 Conflicts of Interest: None declared  
57  
58  
59  
60

\*Corresponding Author: email address: [shetht@mcmaster.ca](mailto:shetht@mcmaster.ca)

## ABSTRACT

**Introduction:** At present, physicians have a limited ability to predict major cardiovascular complications after noncardiac surgery and little is known about the anatomy of coronary arteries associated with perioperative myocardial infarction. We have initiated the Coronary Computed Tomographic Angiography (CTA) VISION Study to (1) establish the predictive value of coronary CTA for perioperative myocardial infarction and death, and (2) describe the coronary anatomy of patients that have a perioperative myocardial infarction.

**Methods and Analysis:** The Coronary CTA VISION Study is prospective observational study. Preoperative coronary CTA will be performed in 1000-1500 patients with a history of vascular disease or at least 3 cardiovascular risk factors who are undergoing major elective noncardiac surgery. Serial troponin will be measured 6-12 hours after surgery and daily for the first 3 days after surgery. Major vascular outcomes at 30 days and 1 year after surgery will be independently adjudicated.

**Ethics and Dissemination:** Coronary CTA results in a measurable radiation exposure that is similar to a nuclear perfusion scan (10 to 12 mSV). Treating physicians will be blinded to the CTA results until 30 days after surgery in order to provide the most unbiased assessment of its prognostic capabilities. The only exception will be the presence of a left main stenosis >50%. This approach is supported by best available current evidence that, excluding left main disease, prophylactic revascularization prior to non-cardiac surgery does not improve

1  
2  
3 outcomes. An external safety and monitoring committee is overseeing the study  
4  
5 and will review outcome data at regular intervals. Publications describing the  
6  
7 results of the study will be submitted to major peer-reviewed journals and  
8  
9 presented at international medical conferences.  
10  
11  
12  
13  
14  
15  
16  
17  
18  
19

20 Key words: perioperative myocardial infarction, computed tomography,  
21  
22 prognosis, coronary artery disease  
23  
24  
25  
26  
27  
28

29 List of Abbreviations:  
30  
31

32 CTA: computed tomographic angiography  
33  
34

35 LAD: left anterior descending  
36  
37

38 ECG: electrocardiogram  
39  
40

41 CAD: coronary artery disease  
42  
43  
44  
45  
46  
47  
48  
49  
50  
51  
52  
53  
54  
55  
56  
57  
58  
59  
60

## INTRODUCTION

Globally over 200 million patients undergo major noncardiac surgery annually. Despite the benefits of surgery, annually over 5 million noncardiac surgery patients will suffer a cardiovascular death or nonfatal myocardial infarction in the first 30 days after surgery<sup>1</sup>.

### Limited Capacity to Predict Major Perioperative Ischemic Events

Accurate risk estimation is important to allow patients and physicians to make informed choices about the appropriateness of surgery and to inform perioperative management (e.g., anesthetic approach). Risk prediction based on clinical risk factors and functional capacity is suboptimal.<sup>2</sup> This is probably because many patients are inactive for substantial periods of time prior to their noncardiac surgery (e.g., orthopedic, vascular, and oncology patients) due to their underlying surgical condition, and as such, many patients with substantial coronary artery disease may not have experienced any suggestive symptoms.

In an attempt to improve preoperative risk prediction, some patients undergo non-invasive cardiac stress tests (e.g., stress echocardiography, nuclear scintigraphy imaging) prior to noncardiac surgery.<sup>3</sup> A recent meta-analysis evaluating these two tests demonstrated, however, that they have only moderate negative likelihood ratios (stress echocardiography 0.23 and stress perfusion imaging 0.44), and that more than a third of the patients who suffered a major perioperative cardiovascular event had a negative preoperative test result.<sup>4</sup> These data represent likely a best case scenario because most of the studies

1  
2  
3 have not assessed whether these non-invasive cardiac stress tests provide  
4  
5 independent prognostic information beyond known clinical variables. The few  
6  
7 studies that have undertaken multivariable regression analysis provide unreliable  
8  
9 estimates because they did not include all the known independent clinical  
10  
11 variables or the analysis had too few events for the number of variables  
12  
13 assessed.<sup>5-9</sup>  
14  
15  
16  
17  
18  
19

### 20 **Mechanisms of Perioperative Ischemic Events**

21  
22 Although perioperative myocardial infarction is the most common major  
23  
24 perioperative cardiac complication, little is known about its pathophysiology.<sup>3</sup>  
25  
26 Understanding the pathophysiology of perioperative myocardial infarction is  
27  
28 important to help inform which potential prophylactic interventions and acute  
29  
30 management interventions should be evaluated in randomized controlled trials to  
31  
32 improve the outcome of patients undergoing noncardiac surgery.  
33  
34  
35

36 A commonly proposed mechanism of perioperative myocardial infarction  
37  
38 relates to myocardial oxygen supply demand mismatch. Fluid shifts,  
39  
40 catecholamine surges, hypotension, anemia and hypoxia can occur during and  
41  
42 after major noncardiac surgery and transiently increase myocardial oxygen  
43  
44 demand.<sup>3</sup> In coronary vessels with high grade stenoses or occlusions, the  
45  
46 supply response may be limited, resulting in supply-demand mismatch  
47  
48 myocardial ischemia or infarction. An additional or alternative mechanism of  
49  
50 perioperative myocardial infarction is that the acute stress of surgery and  
51  
52 mechanical tissue injury induces a hypercoagulable state that increases the risk  
53  
54  
55  
56  
57  
58  
59  
60

1  
2  
3 of coronary thrombus formation at the site of a fissured plaque or with low  
4  
5 coronary flow.  
6  
7  
8  
9

## 10 **Rationale for use of Coronary Computed Tomographic Angiography (CTA)**

### 11 **Prior to Noncardiac Surgery**

12  
13  
14  
15 Coronary CTA may have several advantages for risk stratification prior to  
16  
17 noncardiac surgery. First, coronary CTA does not require exercise or  
18  
19 pharmacologic stress to detect coronary artery disease and therefore is well  
20  
21 suited to the vascular and orthopedic surgical populations who often cannot  
22  
23 exercise or take the necessary pharmacological agents (e.g., patients with  
24  
25 asthma). Second, coronary CTA can exclude obstructive coronary artery  
26  
27 disease very reliably as it has a high sensitivity for the detection of coronary  
28  
29 stenosis;<sup>10-13</sup>  
30  
31  
32  
33

34  
35 Third, coronary CTA is a very sensitive modality for the detection of high-  
36  
37 risk coronary anatomy (left main disease or three or two vessel disease including  
38  
39 the proximal left anterior descending [LAD] artery) as coronary CTA can visualize  
40  
41 these large proximal vessels very well.<sup>13</sup> Fourth, coronary CTA is the only non-  
42  
43 invasive modality that can detect non-obstructive atherosclerosis,<sup>14</sup> and some of  
44  
45 our research (e.g., POISE)<sup>15</sup> offers clues that non-obstructive coronary artery  
46  
47 disease may be responsible for a substantial proportion of the perioperative  
48  
49 myocardial infarctions that occur in the noncardiac surgery setting through  
50  
51 plaque rupture and thrombosis.  
52  
53  
54  
55  
56  
57  
58  
59  
60

1  
2  
3 Finally, coronary CTA can provide a comprehensive anatomic  
4  
5 characterization of the coronary arteries prior to surgery, and this has substantial  
6  
7 potential to shed important insight into the extent of preoperative coronary  
8  
9 atherosclerosis in culprit vessels that are associated with perioperative  
10  
11 myocardial infarction.  
12  
13

## 14 15 16 17 **OBJECTIVES OF THE CORONARY CTA VISION STUDY** 18

19  
20 The Coronary CTA VISION Study is a prospective cohort study that will  
21  
22 examine patients with, or at risk of, atherosclerotic disease who are undergoing  
23  
24 noncardiac surgery in order to determine: if preoperative coronary CTA has  
25  
26 additional predictive value, beyond clinical variables, for the occurrence of major  
27  
28 perioperative cardiac events (i.e., cardiovascular death and nonfatal myocardial  
29  
30 infarction) at 30 days after surgery; and the underlying coronary anatomy  
31  
32 associated with perioperative myocardial infarction. The Coronary CTA VISION  
33  
34 Study is a sub-study of the VISION Study. The Vascular events In noncardiac  
35  
36 Surgery patients cohort evaluation (VISION) Study is a 40,000 patient  
37  
38 international prospective cohort study that we are currently undertaking, and this  
39  
40 study is evaluating perioperative vascular complications in patients undergoing  
41  
42 noncardiac surgery.  
43  
44  
45  
46  
47  
48  
49  
50  
51  
52

## 53 **METHODS**

### 54 55 **Study Design** 56 57 58 59 60

1  
2  
3 The Coronary CTA VISION Study is a prospective observational study of  
4 coronary CTA performed in patients prior to noncardiac surgery.  
5  
6  
7  
8  
9

### 10 **Study Population**

11  
12 The investigators will consider all patients undergoing elective noncardiac  
13 surgery for enrollment. Tables 1 and 2 present the study's inclusion and  
14 exclusion criteria.  
15  
16  
17  
18  
19

### 20 **Clinical Data Collection**

21  
22 After obtaining written informed consent, research personnel will interview  
23 and examine patients and review their charts to obtain information on patient  
24 characteristics that we are evaluating in the VISION Study to determine if they  
25 have potential independent predictors of major perioperative vascular events.  
26  
27 These variables include risk factors, co-morbidities, medications, anesthetic and  
28 surgical variables.  
29  
30  
31  
32  
33  
34  
35  
36  
37  
38  
39

### 40 **CTA Imaging Protocol**

41  
42 Once a patient is consented for the study, research personnel coordinate  
43 an appointment for the patient's preoperative coronary CTA scan. Personnel in  
44 the radiology department see patients prior to the coronary CTA scan and, when  
45 necessary, pre-treat the patients with beta-blockers (to achieve heart rate of 60  
46 or less) and nitroglycerin (at a dose of 0.6 to 0.8 mg administered sublingually) to  
47 optimize image quality. At centres with single source scanners, patients who  
48  
49  
50  
51  
52  
53  
54  
55  
56  
57  
58  
59  
60



1  
2  
3 continue to have a heart rate 70 bpm or greater despite beta-blockade are  
4 excluded from the study (90bpm or greater with dual source scanners). In  
5  
6 patients with asthma, personnel use a calcium channel blocker (diltazem 30 to  
7  
8 120 mg) is used to achieve heart rate control. A non-contrast scan is performed  
9  
10 first. This scan is prospectively triggered at 75% of the RR interval, with 0.4 to  
11  
12 0.625 slice thickness (depending on scanner type) and 3mm increments.  
13  
14  
15 Technicians next perform a contrast scan and inject contrast agent at a rate of  
16  
17 5.5 to 7 ml/s depending on body habitus of the patient being scanned. For an  
18  
19 average patient, the dose of contrast is expected to be approximately 80 ml. The  
20  
21 contrast scan is retrospectively gated or prospectively triggered with 0.4 to 0.625  
22  
23 slice thickness (depending on scanner type). On scanners with the capacity for  
24  
25 prospective triggering, studies are acquired with this technique whenever heart  
26  
27 rate is adequately controlled (HR<65) and regular. For retrospective  
28  
29 acquisitions, dose modulation is used to minimize radiation dose.  
30  
31  
32  
33  
34  
35  
36  
37  
38

39 Standard initial reconstruction of the coronary CTA data set is performed  
40  
41 at 75% of the R-R interval, with additional reconstructions performed as required  
42  
43 for image interpretation. When retrospective gating is used, reconstructions for  
44  
45 functional assessment are performed in 10 phases with 10% increments.  
46  
47  
48  
49

## 50 **Participating Sites**

51  
52  
53 Participating centres have a 64 detector MDCT or greater with the  
54  
55 capacity to perform cardiac CT, an expert reader in cardiology or radiology (as  
56  
57  
58  
59  
60

1  
2  
3 defined by AHA/ACC training standards or their international equivalent) and a  
4  
5 strong collaboration between the imaging team and the clinical peri-operative  
6  
7 medicine service to facilitate patient recruitment. The participating sites are listed  
8  
9 in the Appendix. Each participating site submits several scans to confirm  
10  
11 adherence to the study imaging protocol and achievement of adequate image  
12  
13 quality prior to initiation of study recruitment.  
14  
15  
16  
17  
18  
19

### 20 **CTA Interpretation and Blinding**

21  
22 Coronary CTA is read by an expert radiologist or cardiologist. These  
23  
24 individuals read each coronary CTA exam without knowledge of the clinical data.  
25  
26 They report findings for each vessel, in terms of nature of plaque and extent of  
27  
28 narrowing, and they determine whether each of the following 4 findings are  
29  
30 present on the coronary CTA: (1) normal – no evidence of coronary  
31  
32 atherosclerotic plaque (this excludes subsequent findings), (2) non-obstructive  
33  
34 coronary artery disease – evidence of at least one coronary artery plaque with a  
35  
36 <50% stenosis, (3) obstructive coronary artery disease – at least one coronary  
37  
38 artery plaque with a  $\geq 50\%$  stenosis, or (4) obstructive plaque with high-risk  
39  
40 anatomy ( $\geq 50\%$  stenosis of the left main,  $\geq 50\%$  stenosis in three coronary  
41  
42 arteries, or  $\geq 50\%$  stenosis in two coronary arteries including the proximal left  
43  
44 anterior descending [LAD] artery). Where calcium and/or motion artifacts limit  
45  
46 interpretability, the segment are identified as non-evaluable and a forced  
47  
48 interpretation on the presence of stenosis is made. If there are more than 4 non-  
49  
50  
51  
52  
53  
54  
55  
56  
57  
58  
59  
60

1  
2  
3  
4  
5  
6  
7  
8  
9  
10  
11  
12  
13  
14  
15  
16  
17  
18  
19  
20  
21  
22  
23  
24  
25  
26  
27  
28  
29  
30  
31  
32  
33  
34  
35  
36  
37  
38  
39  
40  
41  
42  
43  
44  
45  
46  
47  
48  
49  
50  
51  
52  
53  
54  
55  
56  
57  
58  
59  
60

evaluable segments, the scan is considered non-diagnostic and excluded from the analysis.

The classification of CTA findings being used in CTA VISION predicts the risk of mortality over 1-2 years in patients with stable coronary artery disease in the non-operative setting,<sup>16</sup> similar to the results of the well validated prognostic classification of invasive coronary angiography that puts increased importance on the number of vessels with  $\geq 50\%$  stenoses, with particular emphasis on involvement of the proximal LAD.<sup>17</sup> Assessment of stenosis severity into board categories (i.e., 50-70% versus  $\geq 70\%$ ) demonstrates very good agreement between coronary CTA and invasive angiography (kappa =0.74).<sup>18</sup> The reader calculates a calcium score using the Agatston method using the non-contrast scan.<sup>19</sup> This score is recorded and is available for subsequent analyses.

If a patient is discovered to have a  $\geq 50\%$  stenosis of the left main we immediately provide this test result to the patient's physicians. All other patients have their results withheld from the clinical care team until 30 days after surgery.

### **Patient Follow-up**

After surgery, patients have a troponin measurement drawn 6 to 12 hours after surgery and on the 1<sup>st</sup>, 2<sup>nd</sup>, and 3<sup>rd</sup> days after surgery. Standard orders ensure these tests are undertaken. Orders also ensure that an electrocardiogram is undertaken immediately after an elevated troponin measurement is detected. Patients who are discovered to have an elevated troponin with or without ECG changes will usually undergo an echocardiogram or

1  
2  
3 a functional evaluation such as nuclear perfusion imaging or stress MRI. Where  
4  
5 clinically indicated, invasive coronary angiography is performed.  
6  
7

8 Research personnel follow patients throughout their time in hospital and  
9  
10 personally evaluate patients and review their medical records ensuring study  
11  
12 orders have been followed and noting any primary or secondary outcomes. The  
13  
14 research personnel contact patients by phone at 30 days and 1 year post  
15  
16 surgery. If patients indicate that they have experienced an outcome or  
17  
18 hospitalization, the research personnel contact their physicians to obtain the  
19  
20 appropriate documentation.  
21  
22  
23  
24  
25  
26

### 27 **Study Outcomes**

28  
29 For our first objective (i.e., to determine if preoperative coronary CTA has  
30  
31 additional predictive value beyond clinical variables) our primary outcome is a  
32  
33 major cardiac event (i.e., a composite of cardiovascular death and nonfatal  
34  
35 myocardial infarction) at 30 days post surgery. Individual secondary outcomes  
36  
37 for our first objective at 1 year after surgery include cardiovascular death,  
38  
39 myocardial infarction, and coronary revascularization. For our second objective  
40  
41 (i.e., to determine the underlying coronary anatomy associated with perioperative  
42  
43 myocardial infarction) our primary and only outcome is myocardial infarction at 30  
44  
45 days after surgery.  
46  
47  
48  
49

50 The first step in determining the underlying coronary artery anatomy  
51  
52 associated with a perioperative myocardial infarction is to determine the region of  
53  
54 the myocardial infarction using a combination of clinical and non-invasive tests.  
55  
56  
57  
58  
59  
60

1  
2  
3 Two cardiologists blinded to the CTA results will independently determine this  
4 using a pre-specified algorithm based on literature and expert opinion (Table 3).  
5  
6 After establishing this, we then look at what the expert CTA evaluators stated  
7  
8 was the underlying coronary artery anatomy (e.g., <50% stenosis, 50 to 69%  
9  
10 stenosis, and  $\geq 70\%$  stenosis) in the coronary artery that supplied the region of  
11  
12 the myocardial infarction.  
13  
14  
15  
16  
17  
18  
19

### 20 **Outcome Adjudication**

21  
22 A committee of clinicians who are blinded to the CTA results adjudicate  
23  
24 the outcomes of death and myocardial infarction. We will use the decisions from  
25  
26 the Adjudication Committee for all statistical analyses.  
27  
28  
29  
30  
31

### 32 **Sample size**

33  
34 Our sample size calculation is based upon our primary objective (i.e., to  
35  
36 determine if preoperative coronary CTA has additional predictive value beyond  
37  
38 clinical variables). Of our 2 objectives, this objective requires the largest number  
39  
40 of patients to ensure the stability of the prediction model. The VISION Study will  
41  
42 determine the optimal clinical risk prediction model, and we will then undertake a  
43  
44 multivariable analysis to determine if the coronary CTA results have additional  
45  
46 predictive value beyond the VISION clinical risk prediction model. Simulation  
47  
48 studies demonstrate that logistic models require 12 to 15 events per predictor to  
49  
50 produce stable estimates.<sup>20-21</sup> We will evaluate 4 potential predictors in our  
51  
52 multivariable analysis: 1 VISION clinical risk prediction score, and 3 types of  
53  
54  
55  
56  
57  
58  
59  
60

1  
2  
3 coronary CTA results (i.e., non-obstructive CAD, obstructive CAD, and  
4  
5 obstructive plaque with high-risk anatomy) with 1 reference category (normal).  
6  
7 Given our eligibility criteria, we expect that the study participants will be evenly  
8  
9 distributed across the 4 CTA result groups.  
10  
11

12  
13 Based upon the VISION Pilot Study and a previous non-invasive cardiac  
14  
15 testing study that we undertook in a similar surgical population,<sup>22</sup> we expect a 6%  
16  
17 event rate for major perioperative cardiac events in this study. Table 4 presents  
18  
19 the various sample sizes needed to test 4 variables in a multivariable analysis  
20  
21 based upon various event rates and the required number of events per variable.  
22  
23 As the table indicates, if our event rate is 6% we will need 1000 patients to  
24  
25 achieve stable estimates. If our event rate is 4%, we may need up to 1500  
26  
27 patients. We are targeting a sample size of 1500 patients but this may change  
28  
29 depending on our event rate at 1000 patients.  
30  
31  
32  
33  
34  
35

### 36 **Data analysis**

37  
38 To address our primary objective, we will undertake a multivariable logistic  
39  
40 regression analysis in which the dependent variable is a major perioperative  
41  
42 cardiac event at 30 days after surgery and the independent variables are the  
43  
44 VISION clinical risk prediction score and the 4 coronary CTA results discussed  
45  
46 above. For this logistic regression analysis we will use forced simultaneous entry  
47  
48 (all candidate variables will remain in the model) as opposed to automated  
49  
50 stepwise selection, because simulation studies have demonstrated a higher risk  
51  
52 of overfitting with the latter approach.<sup>23-24</sup> To assess the reliability of our models  
53  
54  
55  
56  
57  
58  
59  
60

1  
2  
3 we will undertake bootstrapping,<sup>25</sup> because this technique is superior to cross-  
4 validation and jack-knife techniques.<sup>26</sup> We will test the hypothesis that coronary  
5 CTA will have additional predictive value, beyond clinical variables, for the  
6 occurrence of major perioperative cardiac events in patients undergoing  
7 noncardiac surgery using the likelihood ratio (LR) test:  $LR\ test = -2\ln(L1/L2)$   
8 where L1 and L2 are the likelihood for the reduced model with VISION score  
9 alone, and likelihood for the full model with both VISION score and CTA  
10 variables.<sup>27</sup>  
11  
12  
13  
14  
15  
16  
17  
18  
19  
20  
21

22 For the logistic model we will report the odds ratios [OR], 95% confidence  
23 intervals, and associated p-values. For all tests, we will use alpha = 0.05 level of  
24 significance. For all significant associations we will report the likelihood ratio and  
25 the 95% confidence interval.  
26  
27  
28  
29  
30

31 Examination of residuals will provide an assessment of model  
32 assumptions for regression analyses. Goodness-of-fit for the models will be  
33 performed using appropriate Hosmer-Lemeshov tests. For the multivariable  
34 regression analysis, multicollinearity (correlations among predictor variables)  
35 may exist.<sup>28</sup> We will assess colinearity using the variance inflation factor (VIF)  
36 which measures the extent to which the variance of the model coefficients will be  
37 inflated (because of the correlation of the variable with other predictor variables)  
38 if that variable is included in the model. We will consider variables with VIF >10  
39 colinear and we will exclude one of these variables from the analysis.<sup>29</sup>  
40  
41  
42  
43  
44  
45  
46  
47  
48  
49  
50  
51

52 For our secondary objective we will determine the proportion of patients  
53 suffering a perioperative myocardial infarction who on their coronary CTA the  
54  
55  
56  
57  
58  
59  
60

1  
2  
3 myocardial infarction associated artery had a coronary artery stenosis of <50%,  
4  
5 50-69%, ≥70-99%, 100%, or no coronary artery stenosis and the associated 95%  
6  
7 confidence intervals. We will perform all analyses using SAS version 9.2 (Cary,  
8  
9 North Carolina).  
10  
11

## 12 13 14 15 **Ethics**

16  
17 Coronary CTA results in a measurable radiation exposure. Volume  
18  
19 coverage of the whole heart using standard acquisition parameters will  
20  
21 approximately result in an effective dose of 10 to 12 mSv if retrospectively gated  
22  
23 CTA is performed. The dose will likely be substantially lower if prospectively  
24  
25 triggered CTA is performed. The maximum anticipated does is similar to a  
26  
27 nuclear perfusion scan (8 to 12 mSv), but greater than a standard chest CT (5 to  
28  
29 7 mSv)<sup>30</sup> and equals 3 to 4 years of the annual average effective dose from  
30  
31 background radiation (3.6 mSv/year) or approximately 20 % of the annual whole  
32  
33 body effective dose that is allowed for a radiation worker (radiologist, radiological  
34  
35 technologist) (50 mSv/year).<sup>31</sup>  
36  
37  
38  
39

40  
41 We feel that blinding of treating physicians to the coronary CTA findings is  
42  
43 important to provide the most unbiased assessment of its prognostic capabilities.  
44  
45 Thus, in keeping with prior studies that evaluated non-invasive tests in patients  
46  
47 undergoing vascular surgery,<sup>32-33</sup> the attending surgeons and consultants in our  
48  
49 study will not know the results of the pre-operative coronary CTA. The best  
50  
51 evidence presently available from the CARP Trial<sup>34</sup> and DECREASE-V Trial<sup>35</sup>  
52  
53 suggests that there is no benefit to prophylactic coronary revascularization prior  
54  
55  
56  
57  
58  
59  
60



1  
2  
3 to non-cardiac surgery and therefore, the CTA results are not required to guide  
4  
5 treatment prior to non-cardiac surgery. In the CARP Trial one-third of the  
6  
7 patients had 3 vessel coronary artery disease,<sup>34</sup> and in the DECREASE-V Trial  
8  
9 67% of the patients had 3 vessel coronary artery disease.<sup>35</sup> The only exception  
10  
11 is hemodynamically significant left main disease which was excluded in the  
12  
13 CARP trial. Thus, if the coronary CTA suggests significant left main disease, the  
14  
15 results will be immediately disclosed to the treating physicians. For all patients in  
16  
17 the study, the results of coronary CTA will be provided to all family physicians,  
18  
19 internal medicine, and cardiology consultants involved in the care of the patients  
20  
21 at 30 days post surgery.  
22  
23  
24  
25  
26  
27  
28

29 An external safety and monitoring committee (ESMC) will convene early in  
30  
31 the study and will meet again at regular intervals. Interim analyses will be  
32  
33 conducted when approximately 25%, 50%, and 75% of the expected events have  
34  
35 occurred and the data are available. The analyses will be conducted on the total  
36  
37 of adjudicated and unadjudicated events at the appropriate time points. If the  
38  
39 ESCMC decides that a definitive conclusion has been reached for the overall study  
40  
41 population or a specific subgroup, they will immediately unblind the Co-Principal  
42  
43 Investigators and discuss the results together.  
44  
45  
46  
47  
48  
49

## 50 **Conclusion**

51  
52  
53 Coronary CTA is a novel application of CT scanning with potentially  
54  
55 important clinical applications. This study will evaluate the role of coronary CTA  
56  
57  
58  
59  
60

1  
2  
3 in risk stratification prior to noncardiac surgery. If we demonstrate that CTA has  
4  
5 important additional predictive value beyond clinical information in patients  
6  
7  
8 undergoing elective noncardiac surgery, this finding would allow this test to  
9  
10 facilitate informed patient decision-making about the risks of surgery and guide  
11  
12 perioperative patient management. This study will also provide insights into the  
13  
14 underlying coronary anatomy of coronary arteries that cause myocardial  
15  
16 infarction in the perioperative setting. This knowledge will inform the selection of  
17  
18 targeted prevention and management interventions to evaluate in large  
19  
20 perioperative randomized controlled trials. Considering that over 200 million  
21  
22 adults undergo major noncardiac surgery annually and that we know little about  
23  
24 how to predict or manage major perioperative cardiac events, highlights the  
25  
26 importance of the Coronary CTA VISION Study.  
27  
28  
29  
30  
31  
32  
33  
34  
35  
36  
37  
38  
39  
40  
41  
42  
43  
44  
45  
46  
47  
48  
49  
50  
51  
52  
53  
54  
55  
56  
57  
58  
59  
60

## References

1. Devereaux PJ, Chan M, Eikelboom J. Major vascular complications in patients undergoing noncardiac surgery: The magnitude of the problem, risk prediction, surveillance, and prevention. In: Yusuf S, Cairns JA, Camm AJ, Fallen EL, Gersh BJ, editors. *Evidence based Cardiology*. 3rd ed. London, England: BMJ Books, 2009:47-62.
2. Devereaux PJ, Yang H, Yusuf S, et al. Effects of extended-release metoprolol succinate in patients undergoing non-cardiac surgery (POISE trial): a randomized controlled trial. *Lancet* 2008;371(9627):1839-47.
3. Devereaux PJ, Goldman L, Cook DJ, et al. Perioperative cardiac events in patients undergoing noncardiac surgery: a review of the magnitude of the problem, the pathophysiology of the events and methods to estimate and communicate risk. *CMAJ* 2005;173(6):627-34.
4. Beattie WS, Abdelnaem E, Wijeyesundera DN, et al. A meta-analytic comparison of preoperative stress echocardiography and nuclear scintigraphy imaging. *Anesth Analg* 2006;102(1):8-16.
5. Vanzetto G, Machecourt J, Blendea D, et al. Additive value of thallium single-photon emission computed tomography myocardial imaging for prediction of perioperative events in clinically selected high cardiac risk patients having abdominal aortic surgery. *Am J Cardiol* 1996;77(2):143-8.

- 1  
2  
3 6. Coley CM, Field TS, Abraham SA, et al. Usefulness of dipyridamole-thallium  
4 scanning for preoperative evaluation of cardiac risk for nonvascular surgery. Am  
5 J Cardiol 1992;69(16):1280-5.  
6  
7
- 8  
9  
10  
11 7. Brown KA, Rowen M. Extent of jeopardized viable myocardium determined by  
12 myocardial perfusion imaging best predicts perioperative cardiac events in  
13 patients undergoing noncardiac surgery. J Am Coll Cardiol 1993;21(2):325-30.  
14  
15
- 16  
17  
18  
19 8. Boersma E, Poldermans D, Bax JJ, et al. Predictors of cardiac events after  
20 major vascular surgery: Role of clinical characteristics, dobutamine  
21 echocardiography, and beta-blocker therapy. JAMA 2001;285(14):1865-73.  
22  
23
- 24  
25  
26  
27 9. Poldermans D, Arnese M, Fioretti PM, et al. Improved cardiac risk stratification  
28 in major vascular surgery with dobutamine-atropine stress echocardiography. J  
29 Am Coll Cardiol 1995;26(3):648-53.  
30  
31
- 32  
33  
34  
35 10. Mollet NR, Cademartiri F, Krestin GP, et al. Improved diagnostic accuracy  
36 with 16-row multi-slice computed tomography coronary angiography. J Am Coll  
37 Cardiol 2005;45(1):128-32.  
38  
39
- 40  
41  
42  
43 11. Raff GL, Gallagher MJ, O'Neill WW, et al. Diagnostic accuracy of noninvasive  
44 coronary angiography using 64-slice spiral computed tomography. J Am Coll  
45 Cardiol 2005;46(3):552-7.  
46  
47
- 48  
49  
50  
51 12. Leschka S, Alkadhi H, Plass A, et al. Accuracy of MSCT coronary  
52 angiography with 64-slice technology: first experience. Eur Heart J  
53  
54  
55  
56 2005;26(15):1482-7.  
57  
58  
59  
60

1  
2  
3 13. Sheth T, Amlani S, Ellins ML, et al. CT coronary angiographic assessment of  
4 high risk coronary anatomy in patients with suspected coronary artery disease  
5 and intermediate pre-test probability. Am Heart J 2008;in press.  
6  
7

8  
9  
10  
11 14. Butler J, Shapiro M, Reiber J, et al. Extent and distribution of coronary artery  
12 disease: a comparative study of invasive versus noninvasive angiography with  
13 computed angiography. Am Heart J 2007;153(3):378-84.  
14  
15

16  
17  
18  
19 15. Effects of extended-release metoprolol succinate in patients undergoing non-  
20 cardiac surgery (POISE trial): a randomized controlled trial. Lancet 2008.  
21  
22

23  
24  
25 16. Min JK, Shaw LJ, Devereux RB, et al. Prognostic value of multidetector  
26 coronary computed tomographic angiography for prediction of all-cause mortality.  
27 J Am Coll Cardiol 2007;50(12):1161-70.  
28  
29

30  
31  
32  
33 17. Califf RM, Phillips HR, 3rd, Hindman MC, et al. Prognostic value of a  
34 coronary artery jeopardy score. J Am Coll Cardiol 1985;5(5):1055-63.  
35  
36

37  
38  
39 18. Cury RC, Ferencik M, Achenbach S, et al. Accuracy of 16-slice multi-detector  
40 CT to quantify the degree of coronary artery stenosis: assessment of cross-  
41 sectional and longitudinal vessel reconstructions. Eur J Radiol 2006;57(3):345-  
42 50.  
43  
44  
45

46  
47  
48  
49 19. Agatston AS, Janowitz WR, Hildner FJ, et al. Quantification of coronary  
50 artery calcium using ultrafast computed tomography. J Am Coll Cardiol  
51 1990;15:827-32.  
52  
53  
54

- 1  
2  
3 20. Babyak MA. What you see may not be what you get: a brief, nontechnical  
4 introduction to overfitting in regression-type models. *Psychosom Med*  
5  
6 2004;66(3):411-21.  
7  
8  
9  
10  
11 21. Peduzzi P, Concato J, Kemper E, et al. A simulation study of the number of  
12 events per variable in logistic regression analysis. *J Clin Epidemiol*  
13 1996;49(12):1373-9.  
14  
15  
16  
17  
18 22. Gulenchyn KY, Montgomery AG, Sumner G, et al. A pilot study evaluating the  
19 predictive value of noninvasive pharmacological cardiovascular stress testing  
20 before orthopaedic surgery. [Abstract]. *J Nucl Cardiol* 2007;14:S3.  
21  
22  
23  
24  
25  
26  
27 23. Derksen S, Keselman H. Backward, forward and stepwise automated subset  
28 selection algorithms: frequency of obtaining authentic and noise variables. *Br J*  
29 *Math Stat Psychol* 1992;45:265-282.  
30  
31  
32  
33  
34  
35 24. Steyerberg EW, Eijkemans MJ, Harrell FE, Jr. et al. Prognostic modeling with  
36 logistic regression analysis: in search of a sensible strategy in small data sets.  
37 *Med Decis Making* 2001;21(1):45-56.  
38  
39  
40  
41  
42  
43 25. Efron B, Tibshirani R. An introduction to the bootstrap. London: Chapman &  
44 Hall, 2003.  
45  
46  
47  
48  
49 26. Gong G. Cross-validation, the jackknife and the bootstrap: excess error  
50 estimation in forward logistic regression. *J Am Stat Assoc* 1986;81:108-113.  
51  
52  
53  
54 27. Kleinbaum D, Klein M. Logistic Regression. 2nd Edition ed. NY: Springer-  
55 Verlag, 2002.  
56  
57  
58  
59  
60

- 1  
2  
3 28. Wax Y. Collinearity diagnosis for a relative risk regression analysis: an  
4 application to assessment of diet-cancer relationship in epidemiological studies.  
5  
6 Stat Med 1992;11(10):1273-87.  
7  
8  
9  
10  
11 29. Kline R. Data preparation and screening. In: Kline R, editor. Principles and  
12 Practice of Structural Equation Modeling. New York: The Guilford Press,  
13  
14 1998:67-94.  
15  
16  
17  
18  
19 30. Hunold P, Vogt FM, Schmermund A, et al. Radiation exposure during cardiac  
20 CT: effective doses at multi-detector row CT and electron-beam CT. *Radiology*  
21  
22 2003;226(1):145-52.  
23  
24  
25  
26  
27 31. Jakobs TF, Becker CR, Ohnesorge B, et al. Multislice helical CT of the heart  
28 with retrospective ECG gating: reduction of radiation exposure by ECG-controlled  
29 tube current modulation. *Eur Radiol* 2002;12(5):1081-6.  
30  
31  
32  
33  
34  
35 32. Vanzetto G, Machecourt J, Blendea D, et al. Additive value of thallium single-  
36 photon emission computed tomography myocardial imaging for prediction of  
37 perioperative events in clinically selected high cardiac risk patients having  
38 abdominal aortic surgery. *Am J Cardiol* 1996;77(2):143-8.  
39  
40  
41  
42  
43  
44  
45 33. de Virgilio C, Toosie K, Elbassir M, et al. Dipyridamole-thallium/sestamibi  
46 before vascular surgery: a prospective blinded study in moderate-risk patients. *J*  
47  
48 *Vasc Surg* 2000;32(1):77-89.  
49  
50  
51  
52  
53 34. McFalls EO, Ward HB, Moritz TE, et al. Coronary-artery revascularization  
54 before elective major vascular surgery. *N Engl J Med* 2004;351(27):2795-804.  
55  
56  
57  
58  
59  
60

1  
2  
3 35. Poldermans D, Schouten O, Vidakovic R, et al. A clinical randomized trial to  
4 evaluate the safety of a noninvasive approach in high-risk patients undergoing  
5 major vascular surgery: the DECREASE-V Pilot Study. *J Am Coll Cardiol*  
6  
7  
8 2007;49(17):1763-9.  
9  
10  
11  
12  
13  
14  
15  
16  
17  
18  
19  
20  
21  
22  
23  
24  
25  
26  
27  
28  
29  
30  
31  
32  
33  
34  
35  
36  
37  
38  
39  
40  
41  
42  
43  
44  
45  
46  
47  
48  
49  
50  
51  
52  
53  
54  
55  
56  
57  
58  
59  
60

For peer review only



**Table 1. Inclusion Criteria****All patients undergoing elective noncardiac surgery are eligible if they:**

- are > 45 years of age
- require at least an overnight hospital admission after surgery
- are undergoing one of the following surgeries
  - orthopedic (major joint arthroplasty)
  - vascular
  - thoracic surgery (pneumonectomy, lobectomy, other thoracic – wedge lung resection, mediastinal tumor resection, major chest wall resection)
  - major abdominal surgery (partial or total colectomy, stomach surgery, visceral resection, cytoreductive surgery, radical hysterectomy, radical prostatectomy)
  - major organ transplantation (kidney, liver, lung)
- have enough time prior to noncardiac surgery to obtain a coronary CTA study
- fulfill one of the following additional criteria:
  - history of coronary artery disease
  - history of peripheral vascular disease
  - history of stroke
  - history of a physician diagnosis of congestive heart failure; OR
  - any 3 of the following 6 risk factors: (a) diabetes and currently on an oral diabetic drug or insulin therapy, (b) age  $\geq 70$  years, (c) history of smoking within 2 years of surgery, (d) history of treatment for hypercholesterolemia, (e) history of a transient ischemic attack (TIA), or (f) a history of hypertension.

**Table 2. Exclusion Criteria****All patients are excluded if they:**

- are referred to invasive coronary angiography prior to noncardiac surgery (coronary CTA will not provide information incremental to an invasive angiogram)
- have had a prior percutaneous coronary intervention (PCI) with stent implantation (due to limited ability of coronary CTA to evaluate stents)
- have a creatinine clearance <35 ml/min (to avoid risk of contrast nephrotoxicity in patients potentially at risk)
- have a known contrast reaction
- are pregnant
- have persistent atrial fibrillation or >2 atrial or ventricular premature beats on a preoperative 12 lead electrocardiogram (ECG) (suboptimal image quality results from irregular heart rhythms at cardiac CT due to difficulties with retrospective gating)
- weight >300 lbs (obese patients have suboptimal image quality due to a poor contrast to noise ratio)
- have an inability to achieve the required heart rate prior to coronary CTA despite medication (i.e., a beta-blocker or calcium channel blocker) if the patient will be scanned on a single source scanner they require a heart rate <70 beats per minute (bpm) or a heart rate <90 bpm if the patient will be scanned on a dual source scanner; or
- patients who do not undergo noncardiac surgery within 6 months of their coronary CTA.

**Table 3: Diagnostic confidence in determination of culprit lesion in patients who fulfill our definition of myocardial infarction**

| Diagnostic confidence              | Criteria                                                                                                                                                                                                                                                                                                                                                                                                                                                                                                                                                    |
|------------------------------------|-------------------------------------------------------------------------------------------------------------------------------------------------------------------------------------------------------------------------------------------------------------------------------------------------------------------------------------------------------------------------------------------------------------------------------------------------------------------------------------------------------------------------------------------------------------|
| Highly probable location of lesion | <ul style="list-style-type: none"> <li>• Thrombus or features of recent plaque rupture (irregular margins, hazy appearance, dissection) coronary plaque fissure seen on invasive angiography; OR</li> <li>• New area of infarction on cardiac MRI</li> </ul>                                                                                                                                                                                                                                                                                                |
| Probable location of lesion        | <ul style="list-style-type: none"> <li>• New perfusion abnormality identified on SPECT testing</li> <li>• New wall motion abnormality (as determined through comparison of pre and postoperative echocardiography or MRI;</li> <li>• New wall motion abnormality as determined through comparison of preoperative CTA myocardial function and postoperative echocardiography; OR</li> <li>• New Q waves in 2 contiguous leads on the patients ECG</li> </ul>                                                                                                |
| Possible location of lesion        | <ul style="list-style-type: none"> <li>• ST segment elevation [<math>\geq 2</math> mm in leads V<sub>1</sub>, V<sub>2</sub>, or V<sub>3</sub> OR <math>\geq 1</math> mm in the other leads] in two contiguous leads;</li> <li>• ST segment depression [<math>\geq 1</math> mm] in two contiguous leads;</li> <li>• Symmetric inversion of T waves <math>\geq 1</math> mm) in at least two contiguous leads; OR</li> <li>• Presumed new cardiac wall motion abnormality on echocardiography</li> <li>• Presumed new fixed defect on SPECT testing</li> </ul> |

**Table 4: Sample size needed to test 4 variables in a multivariable analysis based upon various event rates and the required number of events per variable**

| Required number of events per variable | Number of events needed | Sample size needed to test 4 variables in a multivariable analysis based upon various event rates |      |
|----------------------------------------|-------------------------|---------------------------------------------------------------------------------------------------|------|
|                                        |                         | 4%                                                                                                | 6%   |
| 10                                     | 40                      | 1000                                                                                              | 667  |
| 12                                     | 48                      | 1200                                                                                              | 800  |
| 15                                     | 60                      | 1500                                                                                              | 1000 |

## Appendix

Co- Principal Investigators: T. Sheth, PJ Devereaux

Co-ordinating Centre: S. Pettit, E. Wendland, D. Heels- Ansdell

External Safety and Monitoring Committee: V. Montori (Chair), N. Valettas, K. Thorlund

## Investigators

Hamilton, Canada: L. Stewart, V. Tandon, M Ferri.

Ottawa, Canada: B. Chow, P. Jetty

Edmonton, Canada: C. Butler, R. Coulden, M. Graham, M. Jacka

Hong Kong, China: M. Chan, GYS. Choi

Durban, South Africa: A. Mitha, T. Kisten, B. Biccard, R. Rodseth

St. Louis, USA: P. Nagele, P. Woodard

Toronto, Canada: A. Crean

Kuala Lumpur, Malaysia: C. Wang, YF Abdul Aziz, R. Sandhu

Sydney, Australia: CK. Chow

New Delhi, India: G. Karthikeyan, G. Gulati

London, Canada: M. Markobrada, A. Islam, A. Goela

Krakow, Poland: W. Szczeklik, T. Miszalski-Jamka, B. Sokolowska

Cleveland, USA: T. Mastracci, M. Desai

## Funding

This work is supported by grants from Canadian Institutes of Health Research, the Hamilton Health Sciences New Investigator Fund, the McMaster University Division of Cardiology, the University of Western Ontario Department of Radiology and the University of Western Ontario Division of General Internal Medicine. The study funders have not role in study design, data collection, data

1  
2  
3 analysis and interpretation, drafting of manuscripts or the decision to submit the  
4  
5 report for publication. There are no conflicts to declare.  
6  
7  
8  
9

### 10 **Contributorship Statements**

11  
12 All authors provided intellectual input into the editing of the manuscript and  
13 preparation for publication.  
14  
15  
16  
17  
18  
19  
20  
21  
22  
23  
24  
25  
26  
27  
28  
29  
30  
31  
32  
33  
34  
35  
36  
37  
38  
39  
40  
41  
42  
43  
44  
45  
46  
47  
48  
49  
50  
51  
52  
53  
54  
55  
56  
57  
58  
59  
60
